# Supplementary material
Source: publisher figshare collection journal article supplement (https://sage.figshare.com/ndownloader/files/14870123)
Supplement: Supplementary file 1 [file 14870123]

### **Supplementary Figures**

**Figure S1** TCGA analysis of the expression levels of five targets of miR-516a-5p in paired and unpaired NSCLC tissues.

**Figure S2** The expression of HIST3H2A was associated with poor survival in NSCLC patients. (A) TCGA analysis of the expression levels of HIST3H2A in paired and unpaired NSCLC tissues. (B) ROC curve was used to obtain a cutoff value of HIST3H2A in NSCLC patients. (C) NSCLC patients were divided into high and low HIST3H2A expression groups according to its cutoff value. (D) Kaplan-Meier analysis of the association of HIST3H2A expression with OS and tumor recurrence in NSCLC patients.

## Supplementary Tables

**Table S1** The association of miR-516a-5p expression with clinicopathologic characteristics in NSCLC patients

| Variables                 | Cases<br>(n) | miR-516a-5p |     | <i>P</i> value |
|---------------------------|--------------|-------------|-----|----------------|
|                           |              | High        | Low |                |
| Total                     | 262          | 74          | 188 |                |
| <i>Age (years)</i>        |              |             |     |                |
| ≥ 60                      | 184          | 44          | 140 | 0.024          |
| < 60                      | 78           | 30          | 48  |                |
| <i>Gender</i>             |              |             |     |                |
| Male                      | 115          | 33          | 82  | 0.891          |
| Female                    | 147          | 41          | 106 |                |
| <i>Pathological stage</i> |              |             |     |                |
| I / II                    | 211          | 53          | 158 | 0.025          |
| III/IV                    | 51           | 21          | 30  |                |
| <i>T stage</i>            |              |             |     |                |
| T1/T2                     | 233          | 60          | 173 | 0.011          |
| T3/T4                     | 29           | 14          | 15  |                |
| <i>N stage</i>            |              |             |     |                |
| Negative                  | 177          | 48          | 129 | 0.561          |
| Positive                  | 85           | 26          | 59  |                |
| <i>M stage</i>            |              |             |     |                |
| Negative                  | 158          | 44          | 114 | 0.889          |
| Positive                  | 104          | 30          | 74  |                |

**Table S2** The association of HIST3H2A expression with clinicopathologic characteristics in NSCLC patients

| Variables                 | Cases<br>(n) | HIST3H2A |     | <i>P</i> value |
|---------------------------|--------------|----------|-----|----------------|
|                           |              | High     | Low |                |
| Total                     | 398          | 353      | 45  |                |
| <i>Age (years)</i>        |              |          |     |                |
| ≥ 60                      | 286          | 251      | 35  | 0.385          |
| < 60                      | 112          | 102      | 10  |                |
| <i>Gender</i>             |              |          |     |                |
| Male                      | 180          | 165      | 15  | 0.111          |
| Female                    | 218          | 188      | 30  |                |
| <i>Pathological stage</i> |              |          |     |                |
| I / II                    | 322          | 286      | 36  | 0.842          |
| III/IV                    | 76           | 67       | 9   |                |
| <i>T stage</i>            |              |          |     |                |
| T1/T2                     | 351          | 313      | 38  | 0.459          |
| T3/T4                     | 47           | 40       | 7   |                |
| <i>N stage</i>            |              |          |     |                |
| Negative                  | 264          | 233      | 31  | 0.741          |
| Positive                  | 134          | 120      | 14  |                |
| <i>M stage</i>            |              |          |     |                |
| Negative                  | 256          | 229      | 27  | 0.514          |
| Positive                  | 142          | 124      | 18  |                |

**Table S3** Cox regression analysis of HIST3H2A expression as survival predictor  
in NSCLC patients

| Variables                  | Univariate Cox regression analysis |         | Multivariate Cox regression analysis |         |
|----------------------------|------------------------------------|---------|--------------------------------------|---------|
|                            | RR (95% CI)                        | P value | RR (95% CI)                          | P value |
| <i>Age (years)</i>         |                                    |         |                                      |         |
| ≥ 60 vs.< 60               | 1.023 (0.698 to 1.499)             | 0.907   | NA                                   | NA      |
| <i>Gender</i>              |                                    |         |                                      |         |
| Male vs. Female            | 1.056 (0.747 to 1.493)             | 0.757   | NA                                   | NA      |
| <i>Pathological stage</i>  |                                    |         |                                      |         |
| III/IV vs. I / II          | 2.258 (1.577 to 3.275)             | <0.0001 | 1.407 (0.870 to 2.276)               | 0.164   |
| <i>T stage</i>             |                                    |         |                                      |         |
| T3+T4 vs. T1+T2            | 2.196 (1.381 to 3.492)             | 0.001   | 1.774 (1.076 to 2.924)               | 0.025   |
| <i>N staging</i>           |                                    |         |                                      |         |
| Positive vs. Negative      | 2.148 (1.522 to 3.032)             | <0.0001 | 1.722 (1.132 to 2.618)               | 0.011   |
| <i>M stage</i>             |                                    |         |                                      |         |
| Positive vs. Negative      | 0.718 (0.494 to 1.043)             | 0.082   | NA                                   | NA      |
| <i>HIST3H2A expression</i> |                                    |         |                                      |         |
| High vs. Low               | 2.504 (1.103 to 5.683)             | 0.028   | 2.523 (1.111 to 5.732)               | 0.027   |

NA: not analyzed
